# Supplementary material for: Improving Future Care: The Role of Oncofertility Education in Medical Curricula in Germany. Results of a nationwide survey of 346 medical students
Source: Research Square preprint supplement (doi:10.21203/rs.3.rs-8809165/v1), 2026-02-11
Supplement: Supplementary file 1 [file 0ee65a5c40efa985f8caa204.docx]

| table 2. knowledge and attitudes of medical students regarding fertility preservation |  |  |
| --- | --- | --- |
|  |  |  |
|  | **n** | **%** |
| Would you personally like to have more expertise in reproductive medicine? | | |
| yes | 276 | 80.0 % |
| no | 55 | 15.9 **%** |
| no answer | 14 | 4.1 % |
| missing data | 1 | 0.3 **%** |
|  | | |
| Is the topic of fertility and cancer sufficiently represented in your studies? | | |
| yes | 50 | 14.5 **%** |
| no | 152 | 44.1 **%** |
| no answer | 143 | 41.4 % |
| missing data | 1 | 0.3 **%** |
|  | | |
| Do you wish for more extensive training programs? | | |
| yes | 228 | 65.9 **%** |
| no | 59 | 17.1 **%** |
| no answer | 59 | 17.1 **%** |
|  | | |
| If so, which format would you prefer? | | |
| face-to-face training | 67 | 29.4 % |
| webinar | 51 | 22.4 % |
| crash course over several days | 28 | 12.3 % |
| rotation to a specialized clinic/practice | 80 | 35.1 % |
| no answer | 1 | 0.4 **%** |
| other | 1 | 0.4 **%** |
| missing data | 118 | 34.1 **%** |
|  | | |
| Which methods for assessing ovarian reserve do you know? (multiple answers) | | |
| AMH measurement | 134 | 38.8 **%** |
| antral follicle count | 55 | 15.9 **%** |
| LH, FSH, estrogen measurements | 194 | 56.2 **%** |
| none | 100 | 29.0 **%** |
| missing data | 1 | 0.3 % |
|  | | |
| Which of the following measures for preserving fertility do you know?  (multiple answers) |  |  |
| cryopreservation of ovarian tissue | 156 | 45.1 **%** |
| cryopreservation of oocytes | 315 | 91.0 **%** |
| GnRH analogs to protect the ovaries during chemotherapy | 99 | 28.6 **%** |
| surgical relocation of the ovaries prior to radiation | 132 | 38.2 **%** |
| none | 13 | 3.8 **%** |
