# Supplementary material for: Improving Future Care: The Role of Oncofertility Education in Medical Curricula in Germany. Results of a nationwide survey of 346 medical students
Source: Research Square preprint supplement (doi:10.21203/rs.3.rs-8809165/v1), 2026-02-11
Supplement: Supplementary file 2 [file fd54d48a957ebb290ab7c80f.docx]

| table 1. characteristics of respondents |  |  |
| --- | --- | --- |
|  |  |  |
|  |  | **%** |
| total number n = 346 | | |
| semester | | |
| 1.-4. semester | 72 | 20.8 % |
| 5.-8. semester | 165 | 47.7 % |
| 9.-13. semester | 109 | 31.5 **%** |
| no answer | 0 | 0 |
|  |  |  |
| Did you already cover gynecology as part of your academic curriculum? | | |
| yes | 150 | 43.4 **%** |
| no | 193 | 55.8 **%** |
| no answer | 3 | 0.9 **%** |
|  |  |  |
| Do you have practical experience in gynecology? | | |
| yes | 151 | 43.6 % |
| no | 194 | 56.1 % |
| no answer | 1 | 0.3 **%** |
|  |  |  |
| gender identity | | |
| female | 278 | 80.3 **%** |
| male | 63 | 18.2 **%** |
| diverse | 4 | 1.2 **%** |
| no answer | 1 | 0.3 **%** |
|  |  |  |
| Did your studies include any course or seminar on fertility preservation and cancer? | | |
| yes | 125 | 36.1 **%** |
| no | 205 | 59.2 **%** |
| no answer | 16 | 4.6 **%** |
|  |  |  |
| Do you have children? | | |
| yes | 26 | 7.5 **%** |
| no | 319 | 92.5 **%** |
| no answer | 0 | 0 |
| missing answer | 1 | 0.3 **%** |
|  |  |  |
| Have you personally utilized options of fertility preservation? | | |
| yes | 12 | 3.5 **%** |
| no | 330 | 95.7 **%** |
| no answer | 3 | 0.9 **%** |
| missing answer | 1 | 0.3% |
